# Supplementary material
Source: HighWire-hosted journal article supplement (http://dmd.aspetjournals.org/highwire/filestream/66663/field_highwire_adjunct_files/0/Supplemental_67942.pdf)
Supplement: Supplemental_67942.pdf [file Supplemental_67942.pdf]

Chan J, Oshiro T, Thomas S, Higa A, Black S, Todorovic A, Elbarbry F, and Harrelson JP (2015). Inactivation of CYP2A6 by the Dietary Phenylpropanoid *trans*-Cinnamic Aldehyde (Cinnamaldehyde) and Estimation of Interactions with Nicotine and Letrozole. *Drug Metabolism and Disposition*. Supplemental material

### Supplemental Figure 1

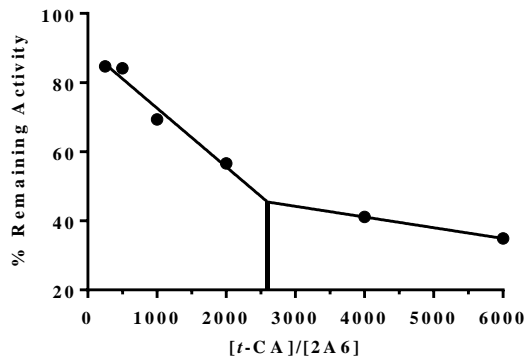

Supplemental Figure 1: Partition ratio determination. The ratio was determined by extrapolation to the x-axis from the intersection point of the lines generated from regression at low and high molar ratio.

Chan J, Oshiro T, Thomas S, Higa A, Black S, Todorovic A, Elbarbry F, and Harrelson JP (2015). Inactivation of CYP2A6 by the Dietary Phenylpropanoid *trans*-Cinnamic Aldehyde (Cinnamaldehyde) and Estimation of Interactions with Nicotine and Letrozole. *Drug Metabolism and Disposition*. Supplemental material

### Supplemental Figure 2

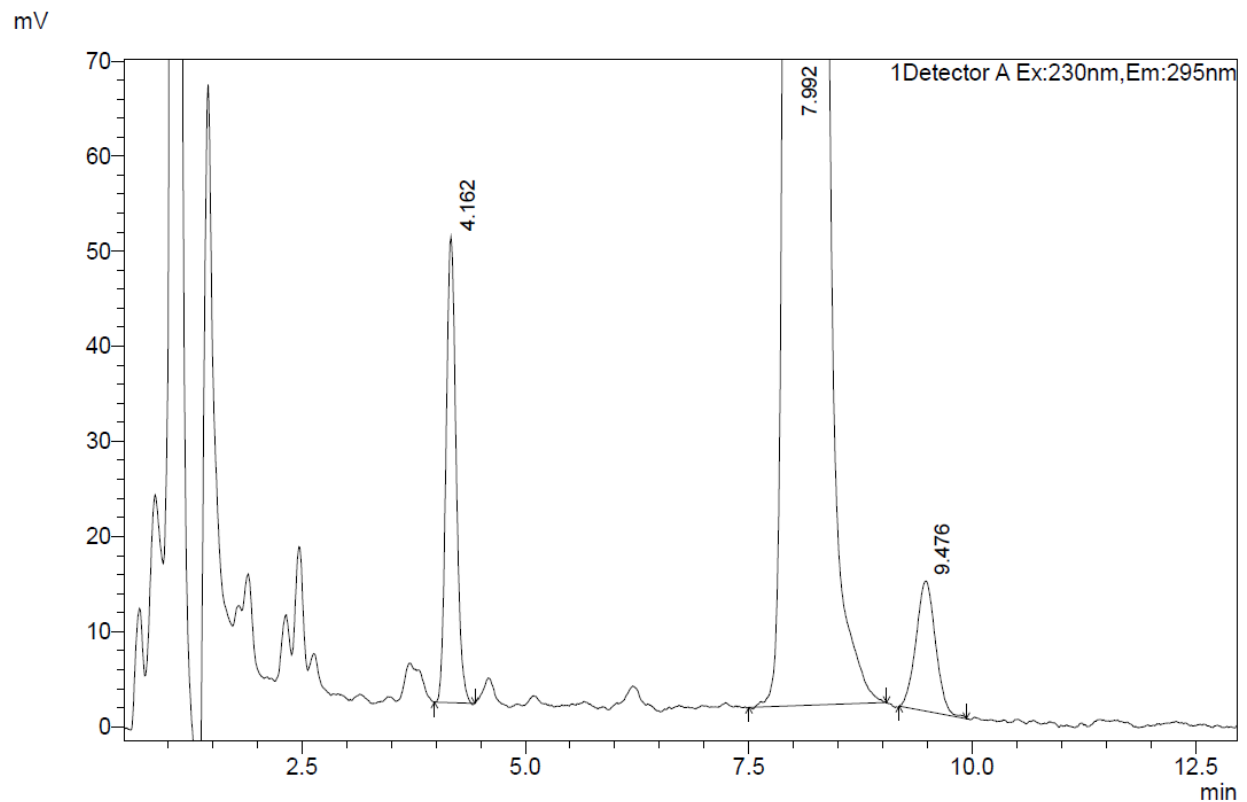

Supplemental Figure 2: Representative HPLC-fluorescence trace from an incubation containing human liver microsomes, *trans*-cinnamic aldehyde (1  $\mu$ M), letrozole (0.5  $\mu$ M), and NADPH (1 mM). Retention times for *trans*-cinnamic aldehyde, letrozole, and the metabolite of letrozole (4,4'-methanol-bisbenzotrile) are 4.162, 7.992, and 9.476 minutes, respectively.
